# Supplementary material
Source: PubMed Central journal article supplement (PMC6499849)
Supplement: 13205_2019_1734_MOESM1_ESM.pdf [file 13205_2019_1734_MOESM1_ESM.pdf]

**Title:** Phylogenetic relationship among Indian population of *Fusarium oxysporum* f. sp. *lentis* infecting lentil and development of specific SCAR markers for detection

**Journal name:** 3 Biotech

**Authors:** Neelakanth S. Hiremani and Sunil C. Dubey

**Affiliation:** Division of Plant Pathology, ICAR-Indian Agricultural Research Institute, New Delhi- 110012, India

**\*Corresponding author:** scdube2002@yahoo.co.in

**Online Resource 1. Isolates of *Fusarium oxysporum* f. sp. *lentis* representing major lentil growing areas of India**

| State          | District    | Place       | Accession No. |
|----------------|-------------|-------------|---------------|
| Uttar Pradesh  | Karwi       | Shivrampur  | FLS 2*        |
|                | Budaun      | Dhanari     | FLS 4*        |
|                | Hamirpur    | Muskara     | FLS 5*        |
|                | Lucknow     | Rahmatnagar | FLS 8*        |
|                | Gazipur     | Shadi Badi  | FLS 10*       |
|                | Basti       | Saoonghat   | FLS 11        |
|                | Lalitpur    | Lalitpur    | FLS 12        |
|                | Lalitpur    | Jakhaura    | FLS 14        |
|                | Jhansi      | Bamaur      | FLS 15        |
|                | Varanasi    | Chaubeypur  | FLS 16        |
|                | Chandauli   | Chandauli   | FLS 17        |
| Bihar          | Bareilly    | Bhagwanpur  | FLS 19        |
|                | Jalaun      | Orai        | FLS 20        |
|                | Muzaffarpur | Muraul      | FLS 22*       |
|                | Khagaria    | Bardaya     | FLS 23*       |
|                | Purnia      | Bhatgaon    | FLS 24        |
|                | Nawada      | Nawada      | FLS 25        |
| Madhya Pradesh | Samastipur  | PUSA        | FLS 26        |
|                | Patna       | Mokama      | FLS 27*       |
|                | Sehore      | Sehore      | FLS 29*       |
|                | Hoshangabad | Rohana      | FLS 30*       |
|                | Damoh       | Jabera      | FLS 31*       |
|                | Panna       | Simariya    | FLS 32*       |
|                | Sagar       | Sagar       | FLS 34        |
| Rewa           | Rewa        | FLS 35      |               |
| Datia          | Padokhar    | FLS 36      |               |

|              |              |            |         |
|--------------|--------------|------------|---------|
|              | Bhopal       | Jhikaria   | FLS 37  |
|              | Dewas        | Berakhedi  | FLS 39  |
|              | Betul        | Multai     | FLS 40* |
|              | Damoh        | Singrampur | FLS 43  |
|              | Burhanpur    | Shahpur    | FLS 47  |
| Jharkhand    | Hazaribagh   | Hazaribagh | FLS 51* |
|              | Chatra       | Chatra     | FLS 52* |
|              | Giridih      | Dumri      | FLS 53  |
|              | Giridih      | Bagodra    | FLS 54  |
|              | Palamu       | Daltonganj | FLS 56  |
|              | Ranchi       | Ranchi     | FLS 58* |
| Chhattisgarh | Raigarh      | Jamgaon    | FLS 61* |
|              | Baloda Bazar | Bhatapara  | FLS 62* |
|              | Raipur       | Sankara    | FLS 63  |
|              | Raigarh      | Jamgaon    | FLS 64  |
|              | Durg         | Jeora      | FLS 65* |
|              | Kabirdham    | Kawardha   | FLS 66  |
| Rajasthan    | Nagaur       | Mayapur    | FLS 67* |
|              | Dholpur      | Dholpur    | FLS 69  |
|              | Bundi        | Jarkhoda   | FLS 70  |
|              | Nagaur       | Dabra      | FLS 71  |
|              | Jaipur       | Durgapura  | FLS 72* |
|              | Jaipur       | Durgapura  | FLS 74  |
| Delhi        | New Delhi    | IARI       | FLS 75* |

\* Indicate the race representative isolates used in phylogenetic analysis through ITS and TEF markers whose sequences are deposited in NCBI
