# Supplementary material
Source: PubMed Central journal article supplement (PMC6499849)
Supplement: 13205_2019_1734_MOESM2_ESM.pdf [file 13205_2019_1734_MOESM2_ESM.pdf]

**Title:** Phylogenetic relationship among Indian population of *Fusarium oxysporum* f. sp. *lentis* infecting lentil and development of specific SCAR markers for detection

**Journal name:** 3 Biotech

**Authors:** Neelakanth S. Hiremani and Sunil C. Dubey

**Affiliation:** Division of Plant Pathology, ICAR-Indian Agricultural Research Institute, New Delhi- 110012, India

**\*Corresponding author:** scdube2002@yahoo.co.in

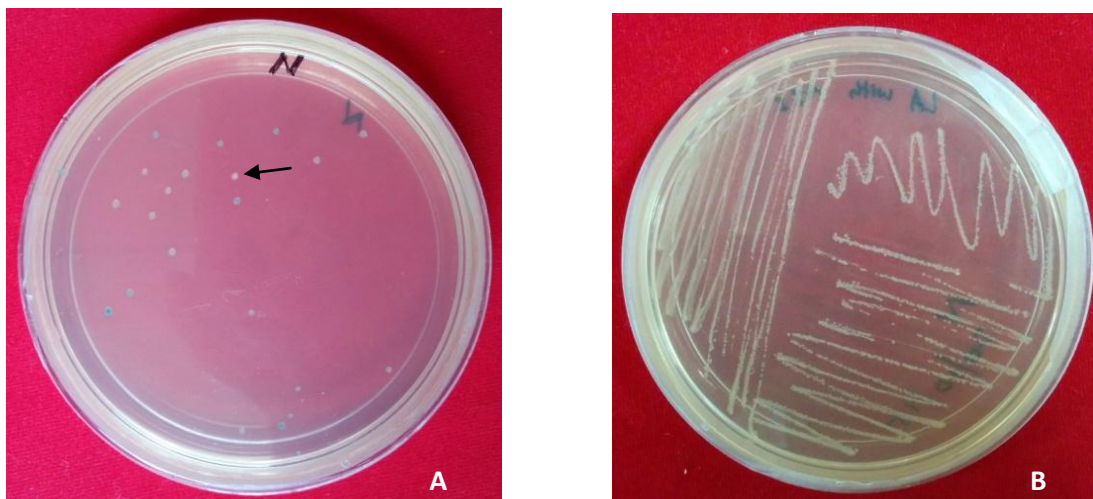

**Online resource 2.** The plates showing the blue/ white colonies after spreading (A) and only white colonies after streaking (B) a single white colony on the Luria agar plate amended with IPTG, X-gal and ampicillin after overnight incubation at 37°C. The arrow indicates a white colony and plate B served as master plate.
