# Supplementary material
Source: PubMed Central journal article supplement (PMC6499849)
Supplement: 13205_2019_1734_MOESM3_ESM.pdf [file 13205_2019_1734_MOESM3_ESM.pdf]

**Title:** Phylogenetic relationship among Indian population of *Fusarium oxysporum* f. sp. *lentis* infecting lentil and development of specific SCAR markers for detection

**Journal name:** 3 Biotech

**Authors:** Neelakanth S. Hiremani and Sunil C. Dubey

**Affiliation:** Division of Plant Pathology, ICAR-Indian Agricultural Research Institute, New Delhi- 110012, India

**\*Corresponding author:** scdube2002@yahoo.co.in

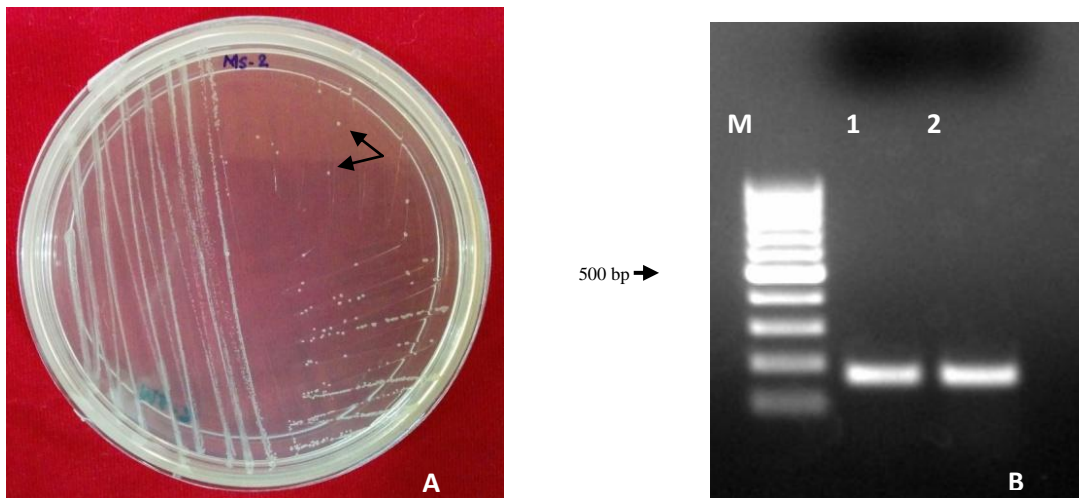

**Online resource 3.** The plate showing the white colonies after streaking a single colony from master plate on the Luria agar plate amended with IPTG, X-gal and ampicillin (sub-plate) after overnight incubation at 37°C (A), the arrows indicate single white transformed colonies. The gel picture (B) shows the amplification of inserted DNA through colony polymerase chain reaction for MS 2 marker. Lanes M- 100 bp ladder, 1- FLS 23 and 2- FLS 75.
